# Supplementary material for: The autoxidation of aliphatic esters. Part 2. The autoxidation of neopentyl esters
Source: Royal Society of Chemistry journal article supplement (doi:10.1039/b004589f), 2000-01-01
Supplement: b004589f.doc [file b004589f.doc]

# Supplementary data

**The autoxidation of aliphatic esters. Part II. The autoxidation of neopentyl esters**

**John R Lindsay Smith,* Eiji Nagatomi and David J Waddington**

*Department of Chemistry, University of York, Heslington, York, UK YO10 5DD*

# Tables A–H, containing data on the autoxidation of compounds 1–5 and 1′

**Table A** The autoxidation of neopentyl butanoate (**1**) 1.5 cm3, ester;

5 bar, oxygen; 438 K

|  | Yields / 10-2 mol dm-3 | | | | | | | | | | |
| --- | --- | --- | --- | --- | --- | --- | --- | --- | --- | --- | --- |
| Reaction time / min | 60 | | 75 | | | 90 | | | 120 | | |
| [Substrate]a | 10.1 | | | 23.0 | | | 31.3 | | | 43.7 | |
| Products | Ab | Bc | | Ab | Bc | | Ab | Bc | | Ab | Bc |
| Carbon monoxide  Carbon dioxide  Formaldehyde  Acetone  *t*-Butyl hydroperoxide  *t*-Butanol  *t*-Butyl formate  Neopentanol  Neopentyl formate  Neopentyl acetate  Neopentyl propanoate  2,2-Dimethylpropanal  2,2-Dimethylpropanoic acid  Acetic acid  Propanoic acid  Butanoic acid  **1e**  **1f**  **1h**  **1I**  **1l**  **1n**  **1r**  **1t**  Peroxidese | d  0.09  0.04  0.37  0.08  0.15  0.06  0.53  0.02  0.00  0.00  0.00  0.02  0.00  0.03  0.24  0.12  0.25  0.28  d  0.00  0.04  0.01  0.06  0.87 | d  d  d  0.38  0.00  0.24  0.06  0.52  0.02  0.00  0.00  0.18  0.03  0.00  0.02  0.30  0.29  0.09  0.53  0.00  0.00  0.08  0.03  0.10  0.00 | | d  0.47  0.05  1.86  0.21  0.96  0.17  1.49  0.08  0.00  0.00  0.00  0.42  0.93  0.48  2.74  0.41  0.64  1.21  d  0.12  0.32  0.08  0.21  2.06 | d  d  d  1.74  0.00  1.20  0.17  1.51  0.09  0.00  0.00  0.27  0.47  0.86  0.54  2.94  0.72  0.47  1.64  0.11  0.15  0.42  0.14  0.40  0.00 | | 3.07  0.96  0.06  4.22  0.35  2.19  0.36  2.85  0.25  0.02  0.00  0.00  0.79  1.92  1.03  5.24  0.63  1.12  1.97  d  0.49  0.56  0.14  0.45  2.60 | d  d  d  4.04  0.00  2.56  0.39  2.86  0.26  0.02  0.00  0.71  0.86  1.93  1.10  5.57  0.97  0.88  2.48  0.12  0.52  0.69  0.20  0.70  0.00 | | 5.00  2.09  0.02  7.81  0.35  3.94  0.65  5.14  0.71  0.08  0.04  0.00  1.29  3.59  1.86  9.40  0.96  1.69  2.85  d  0.98  0.83  0.19  0.74  1.41 | d  d  d  7.53  0.00  4.37  0.61  5.16  0.69  0.08  0.04  0.00  1.38  3.49  1.90  9.44  1.20  1.50  3.11  0.00  1.20  0.91  0.23  0.88  0.00 |

a) Conversion of the substrate: [Substrate]0 = 5.30 mol dm-3. b) Yield before triphenylphosphine reduction. c) Yield after triphenylphosphine reduction.

d) Not determined. e) Total yield of hydroperoxides, peracids and hydrogen peroxide.

**Table B** The autoxidation of neopentyl 2,2-dimethylpropanoate (**2**)

1.5 cm3, ester; 5 bar, oxygen; 438 K

|  | Yields / 10-2 mol dm-3 | | | | | | | | |
| --- | --- | --- | --- | --- | --- | --- | --- | --- | --- |
| Reaction time / min | 120 | | 180 | | | 240 | | |  |
| [Substrate]a | 2.4 | | 5.0 | | | | 10.9 | | |
| Products | Ab | Bc | Ab | Bc | Ab | | | Bc | |
| Carbon monoxide  Carbon dioxide  Formaldehyde  Acetone  *t*-Butyl hydroperoxide  *t*-Butanol  *t*-Butyl formate  Neopentanol  2,2-Dimethylpropanal  2,2-Dimethylpropanoic acid  **2e**  **2r**  **2t**  Peroxidese | d  0.00  0.04  0.31  0.05  0.09  0.04  0.00  0.00  0.24  0.03  0.00  0.02  0.24 | d  d  d  0.27  0.00  0.13  0.03  0.00  0.08  0.31  0.02  0.03  0.04  0.00 | d  0.11  0.04  0.83  0.08  0.39  0.08  0.10  0.00  1.38  0.05  0.02  0.07  0.31 | d  d  d  0.75  0.00  0.41  0.08  0.10  0.10  1.42  0.08  0.04  0.11  0.00 | 1.73  0.26  0.06  1.77  0.09  0.78  0.15  0.26  0.00  2.87  0.13  0.03  0.16  0.47 | | | d  d  d  1.66  0.00  0.84  0.14  0.26  0.00  3.10  0.17  0.07  0.22  0.00 | |

a) Conversion of the substrate: [Substrate]0 = 4.59 mol dm-3. b) Yield before triphenylphosphine reduction. c) Yield after triphenylphosphine reduction.

d) Not determined. e) Total yield of hydroperoxides, peracids and hydrogen peroxide.

**Table C** The autoxidation of neopentyl 3,3-dimethylbutanoate (**3**)

1.5 cm3, ester; 5 bar, oxygen; 438 K

|  | Yields / 10-2 mol dm-3 | | | | | | | | | | |
| --- | --- | --- | --- | --- | --- | --- | --- | --- | --- | --- | --- |
| Reaction time / min | 120 | | 150 | | | 180 | | | 210 | | |
| [Substrate]a | 4.8 | | | 6.3 | | | 11.8 | | | 25.5 | |
| Products | Ab | Bc | | Ab | Bc | | Ab | Bc | | Ab | Bc |
| Carbon monoxide  Carbon dioxide  Formaldehyde  Acetone  *t*-Butyl hydroperoxide  *t*-Butanol  *t*-Butyl formate  Neopentanol  Neopentyl formate  2,2-Dimethylpropanal  2,2-Dimethylpropanoic acid  3,3-Dimethylbutanoic acid  **3e**  **3f**  **3h**  **3l**  **3n**  **3r**  **3t**  Peroxidese | d  0.21  0.04  1.00  0.15  0.52  0.12  0.20  0.10  0.00  0.11  1.08  0.04  0.14  0.05  0.09  0.00  0.00  0.09  0.65 | d  d  d  0.97  0.00  0.65  0.10  0.24  0.09  0.09  0.15  1.31  0.10  0.10  0.10  0.11  0.00  0.05  0.16  0.00 | | d  0.32  0.04  1.98  0.14  1.07  0.17  0.46  0.19  0.00  0.27  2.53  0.07  0.23  0.13  0.21  0.00  0.03  0.17  0.77 | d  d  d  1.86  0.00  1.15  0.18  0.47  0.17  0.11  0.25  2.55  0.11  0.19  0.15  0.21  0.07  0.08  0.25  0.00 | | 2.33  0.64  0.05  2.89  0.12  1.69  0.27  0.76  0.28  0.00  0.38  3.92  0.10  0.33  0.18  0.32  0.08  0.07  0.27  0.82 | d  d  d  2.70  0.00  1.77  0.26  0.76  0.28  0.08  0.38  4.13  0.14  0.31  0.21  0.35  0.15  0.11  0.34  0.00 | | d  0.94  0.04  4.32  0.13  2.52  0.37  1.07  0.43  0.00  0.51  5.39  0.13  0.45  0.26  0.44  0.16  0.08  0.34  0.69 | d  d  d  4.01  0.00  2.59  0.32  1.08  0.42  0.07  0.53  5.35  0.18  0.42  0.26  0.49  0.17  0.13  0.40  0.00 |

a Conversion of the substrate: [Substrate]0 = 4.20 mol dm-3. b Yield before triphenylphosphine reduction. c) Yield after triphenylphosphine reduction.

d) Not determined. e) Total yield of hydroperoxides, peracids and hydrogen peroxide.

**Table D** The autoxidation of neopentyl 2,2-dimethylbutanoate (**4**)

1.5 cm3, ester; 5 bar, oxygen; 438 K

|  | Yields / 10-2 mol dm-3 | | | | | | | | | | |
| --- | --- | --- | --- | --- | --- | --- | --- | --- | --- | --- | --- |
| Reaction time / min | 90 | | 120 | | | 150 | | | 180 | | |
| [Substrate]a | 3.1 | | | 5.6 | | | 17.6 | | | 20.0 | |
| Products | Ab | Bc | | Ab | Bc | | Ab | Bc | | Ab | Bc |
| Carbon monoxide  Carbon dioxide  Formaldehyde  Acetone  Butanone  3-Methylbutan-2-one  *t*-Butyl hydroperoxide  *t*-Butanol  *t*-Butyl formate  Neopentanol  Neopentyl formate  Neopentyl acetate  2,2-Dimethylpropanal  2,2-Dimethylpropanoic acid  Acetic acid  2,2-Dimethylbutanoic acid  **4e**  **4f**  **4h**  **4I**  **4n**  **4r**  **4t**  Peroxidese | d  0.72  0.03  1.64  0.20  0.39  0.11  0.09  0.04  0.78  0.15  0.02  0.14  0.28  0.78  1.64  0.11  0.09  0.16  0.42  0.31  0.10  0.16  1.06 | d  d  d  1.57  0.24  0.39  0.00  0.19  0.05  0.78  0.16  0.02  0.19  0.26  0.87  1.65  0.15  0.07  0.18  0.41  0.43  0.14  0.26  0.00 | | 3.08  1.04  0.02  2.52  0.29  0.68  0.11  0.11  0.05  1.14  0.42  0.02  0.00  0.47  1.26  2.61  0.15  0.12  0.20  0.62  0.40  0.12  0.22  1.04 | d  d  d  2.40  0.32  0.69  0.00  0.23  0.05  1.08  0.42  0.02  0.15  0.46  1.40  2.70  0.20  0.12  0.24  0.58  0.55  0.18  0.35  0.00 | | d  1.10  0.02  3.46  0.38  1.03  0.16  0.13  0.06  1.41  0.78  0.05  0.00  0.57  1.91  3.71  0.19  0.17  0.25  0.83  0.49  0.15  0.28  1.14 | d  d  d  3.29  0.42  1.04  0.00  0.28  0.06  1.45  0.79  0.05  0.15  0.63  1.99  3.86  0.25  0.17  0.29  0.80  0.67  0.20  0.43  0.00 | | d  1.40  0.03  3.76  0.46  1.42  0.26  0.18  0.06  2.06  1.06  0.07  0.00  0.77  2.32  4.73  0.24  0.21  0.31  1.05  0.57  0.18  0.37  1.36 | d  d  d  3.43  0.50  1.41  0.00  0.43  0.05  2.00  1.06  0.07  0.11  0.84  2.61  5.06  0.31  0.20  0.34  1.02  0.81  0.23  0.61  0.00 |

a Conversion of the substrate: [Substrate]0 = 4.20 mol dm-3. b) Yield before triphenylphosphine reduction. c) Yield after triphenylphosphine reduction.

d) Not determined. e) Total yield of hydroperoxides, peracids and hydrogen peroxide.

**Table E** The autoxidation of neopentyl butanoate (**1**) and neopentyl

2-methylbutanoate (**5**). 1.5 cm3, ester; 5 bar, oxygen; 438 K

|  | Yields / 10-2 mol dm-3 | | | | | | | |
| --- | --- | --- | --- | --- | --- | --- | --- | --- |
| Substrate | **1** | | **1** | | | **5** | |  |
| Reaction time / min | 60 | | 90 | | | 60 | |  |
| [Substrate]a | 10.1 | d | 31.1 | d | 27.7 | | d | |
| Products | Ab | Bc | Ab | Bc | Ab | | Bc | |
| Carbon monoxide  Carbon dioxide  Formaldehyde  Acetone  Butanone  *t*-Butyl hydroperoxide  *t*-Butanol  *t*-Butyl formate  Neopentanol  Neopentyl formate  2,2-Dimethylpropanal  2,2-Dimethylpropanoic acid  Acetic acid  Butanoic acid  2-Methylbutanoic acid  **e**  **f**  **t**  Peroxidese | d  0.09  0.04  0.37  d  0.08  0.15  0.06  0.53  0.02  0.00  0.02  0.00  0.24  d  0.12  0.25  0.06  0.87 | d  d  d  0.38  d  0.00  0.24  0.06  0.52  0.02  0.18  0.03  0.00  0.30  d  0.29  0.09  0.10  0.00 | 3.07  0.96  0.06  4.22  d  0.35  2.19  0.36  2.85  0.25  0.00  0.79  1.92  5.24  d  0.63  1.12  0.45  2.60 | d  d  d  4.04  d  0.00  2.56  0.39  2.86  0.26  0.71  0.86  1.93  5.57  d  0.97  0.88  0.70  0.00 | 5.00  2.09  0.01  4.90  8.25  0.12  1.84  0.00  3.37  0.19  1.17  1.71  4.44  d  5.15  3.44  3.61  0.37  1.13 | | d  d  d  4.47  8.21  0.00  2.22  0.00  3.34  0.19  1.69  1.82  5.16  d  5.31  4.04  3.61  0.44  0.00 | |

a Conversion of the substrate: [Substrate]0 = 5.39 mol dm-3. b) Yield before triphenylphosphine reduction. c) Yield after triphenylphosphine reduction.

d) Not determined. e) Total yield of hydroperoxides, peracids and hydrogen peroxide.

**Table F** The autoxidation of neopentyl butanoate (**1**) and 1,1-[2H2]- neopentyl butanoate (**1’**). 1.5 cm3, ester; 5 bar, oxygen; 438 K

|  | Yields / 10-2 mol dm-3 | | | | | | | |
| --- | --- | --- | --- | --- | --- | --- | --- | --- |
| Substrate | **1** | | **1** | | | **1’** | |  |
| Reaction time / min | 60 | | 90 | | | 60 | |  |
| Products | Aa | Bb | Aa | Bb | Aa | | Bb | |
| Carbon dioxide  Acetone  *t*-Butyl hydroperoxide  *t*-Butanol  *t*-Butyl formate  Neopentanol  Neopentyl formate  Neopentyl acetate  2,2-Dimethylpropanal  2,2-Dimethylpropanoic acid  Acetic acid  Propanoic acid  Butanoic acid  **1e**  **1f**  **1h**  **1I**  **1l**  **1n**  **1r**  **1t**  Peroxidesd | 0.23  0.65  0.11  0.29  0.07  0.60  0.02  0.00  0.17  0.05  0.13  0.07  0.66  0.18  0.30  0.16  0.20  0.00  0.10  0.03  0.08  1.19 | c  0.62  0.00  0.43  0.08  0.62  0.03  0.00  0.34  0.04  0.16  0.09  0.75  0.36  0.17  0.71  0.09  0.00  0.14  0.05  0.15  0.00 | 0.86  3.16  0.00  1.48  0.15  1.71  0.14  0.07  0.51  0.24  0.81  0.42  3.02  0.53  0.72  1.25  0.00  0.27  0.37  0.05  0.29  0.11 | c  3.02  0.00  1.49  0.16  1.71  0.14  0.08  0.54  0.26  0.75  0.40  3.10  0.53  0.71  1.28  0.00  0.26  0.38  0.07  0.29  0.00 | 0.77  2.08  0.00  0.47  0.04  1.89  0.14  0.10  0.23  0.03  0.83  0.37  1.27  0.50  0.77  1.70  0.22  0.20  0.52  0.11  0.36  0.16 | | c  2.01  0.00  0.48  0.04  1.94  0.14  0.10  0.24  0.03  1.01  0.39  1.37  0.55  0.77  1.80  0.21  0.23  0.53  0.13  0.41  0.00 | |

a Yield before triphenylphosphine reduction. b Yield after triphenylphosphine reduction. c) Not determined. d) Total yield of hydroperoxides, peracids and hydrogen peroxide.

**Table G** Yields of hydroperoxides from the autoxidation of neopentyl esters: 1.5 cm3, ester; 5 bar, oxygen; 438 K

|  | Yields / 10-2 mol dm-3 | | | | | | | |
| --- | --- | --- | --- | --- | --- | --- | --- | --- |
| Time / min | 60 | 75 | 90 | 120 | 150 | 180 | 210 | 240 |
| Ester **1**  -acyl **1d**  -acyl **1g**  -acyl **1j**  -alkyl **1a**  -alkyl **1q** | 0.17  0.25  0.00  0.18  0.02 | 0.31  0.43  0.03  0.27  0.06 | 0.34  0.51  0.03  0.71  0.06 | 0.24  0.26  0.22  0.00  0.04 |  |  |  |  |
| Ester **2**  -acyl **2d**  -alkyl **2a**  -alkyl **2q** |  |  |  | 0.00  0.08  0.03 |  | 0.03  0.10  0.02 |  | 0.04  0.00  0.04 |
| Ester **3**  -acyl **3d**  -acyl **3g**  -acyl **3j**  -alkyl **3a**  -alkyl **3q** |  |  |  | 0.06  0.05  0.04  0.09  0.05 | 0.04  0.02  0.00  0.11  0.05 | 0.04  0.03  0.03  0.08  0.04 | 0.05  0.00  0.05  0.07  0.05 |  |
| Ester **4**  -acyl **4g**  -alkyl **4a**  -alkyl **4q** |  |  | 0.02  0.05  0.04 | 0.04  0.15  0.06 | 0.04  0.15  0.05 | 0.03  0.11  0.05 |  |  |

**Table H** The rates of the autoxidation of neopentyl esters in terms of

[Substrate]a and yieldb of the relevant acid at 438 K. 1.5 cm3, ester; 5 bar, oxygen; 438 K

|  |  | Yields / 10-2 mol dm-3 | | | | | | | |
| --- | --- | --- | --- | --- | --- | --- | --- | --- | --- |
|  | Time / min | 60 | 75 | 90 | 120 | 150 | 180 | 210 | 240 |
| **1**  **2**  **3**  **4**  **5** | [Substrate]a  [acid]b  [Substrate]a  [acid]b  [Substrate]a  [acid]b  [Substrate]a  [acid]b  [Substrate]a  [acid]b | 10.1  0.2  27.7  5.2 | 23.0  2.7 | 31.1  5.2  3.1  1.6 | 43.7  9.4  2.4  0.2  4.8  1.1  5.6  2.6 | 6.3  2.5  17.6  3.7 | 5.0  1.4  11.8  3.9  20.0  4.7 | 25.5  5.4 | 10.9  2.9 |

a) Conversion of the substrate: [Substrate]o = 5.39 mol dm-3. b) [acid]/10-2 mol dm-3
